# Supplementary material for: Facile fabrication of raspberry-like composite microspheres for the construction of superhydrophobic films and applications in highly efficient oil–water separation
Source: Royal Society of Chemistry journal article supplement (doi:10.1039/c7ra07250c), 2017-01-01
Supplement: c7ra07250c5.pdf [file c7ra07250c5.pdf]

## Supporting Information

Facile fabrication of raspberry-like composite microspheres for the construction of superhydrophobic films and applications in highly efficient oil–water separation

Mingguang Yu<sup>a</sup>, Qing Wang<sup>b\*</sup>, Min Zhang<sup>a</sup>, Qianjun Deng<sup>a</sup>, Dongchu Chen<sup>a</sup>

*a School of Materials Science and Energy Engineering, Foshan University, Foshan 528000, China.*

*b State Key Laboratory of Pulp & Paper Engineering, South China University of Technology, Guangzhou 510640, China.*

**\*Corresponding authors: wangqing\_1216@126.com**

**Movie S1.** Video of superhydrophobicity with  $< 4^\circ$  SA of hydrophobization modified raspberry-like PS@SiO<sub>2</sub> composite microspheres.

**Movie S2.** Video of selective oil-water separation using coated copper mesh.

**Movie S3.** Video of superhydrophobicity of coated copper mesh after oil-water separation test.

**Movie S4.** Video of selective absorption of oil-water separation using coated PU sponge.

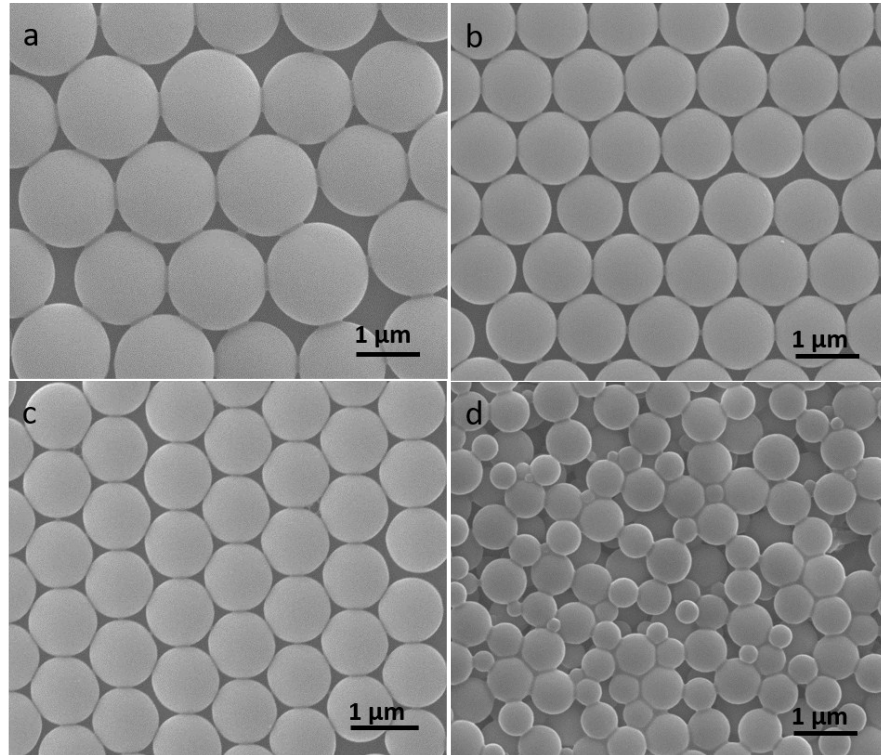

Fig.S1 SEM images of PS microspheres with: (a) PVP-10; (b) PVP-40; (c) PVP-58 and (d) PVP-130.

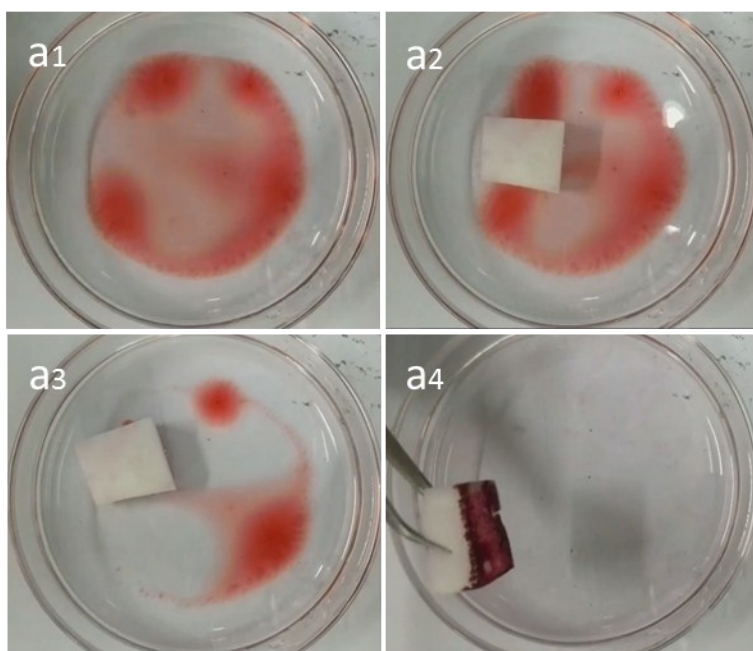

Fig.S2 Optical pictures of the superhydrophobic sponge immersed into water by an external force.
